# Supplementary material for: Novel Expression of GLUT3, GLUT6 and GLUT10 in Equine Gluteal Muscle Following Glycogen-Depleting Exercise: Impact of Dietary Starch and Fat
Source: MDPI journal article supplement (doi:10.3390/metabo13060718), 2023-06-01
Supplement: s1 [file s1]

**Table S1.** Nutrient analysis of Diet Concentrates (LS-HF=Low-starch; MS=Medium Starch; HS=High starch) and Hay (Timothy Grass), on a DM basis.

| Nutrient                   |         | LS-HF | MS   | HS   |
|----------------------------|---------|-------|------|------|
| Moisture                   | %       | 10.7  | 9.8  | 10.4 |
| Dry Matter                 | %       | 89.3  | 90.2 | 89.6 |
| Crude Protein              | %       | 9.4   | 10.9 | 11.0 |
| Digestible Energy          | Mcal/kg | 3.1   | 3.1  | 3.0  |
| ADF                        | %       | 25.3  | 29.0 | 40.5 |
| NDF                        | %       | 37.1  | 41.9 | 57.1 |
| Hemicellulose <sup>1</sup> | %       | 11.8  | 12.8 | 16.6 |
| Starch                     | %       | 25.7  | 17.8 | 3.2  |
| Sugars                     | %       | 10.0  | 9.6  | 8.9  |
| NSC <sup>2</sup>           | %       | 35.6  | 27.3 | 12.1 |
| Crude Fat                  | %       | 3.8   | 5.1  | 8.0  |
| Ash                        | %       | 5.7   | 6.0  | 6.8  |

<sup>1</sup>Hemicellulose: calculated as NDF-ADF; ADF= acid detergent fiber, NDF = neutral detergent fiber,

<sup>2</sup>NSC= nonstructural carbohydrate calculated as Starch+Sugars

**Table S2.** Nutrient analysis of Diet Concentrates (LS-HF=Low-starch; MS=Medium Starch; HS=High starch) and Hay (Timothy Grass), on a DM basis.

| Nutrient                   |         | LS-HF | MS   | HS   | HAY  |
|----------------------------|---------|-------|------|------|------|
| Moisture                   | %       | 10.8  | 9.6  | 11.6 | 10.0 |
| Dry Matter                 | %       | 89.2  | 90.4 | 88.4 | 90.0 |
| Crude Protein              | %       | 12.0  | 11.8 | 9.4  | 10.2 |
| Digestible Energy          | Mcal/kg | 3.3   | 3.6  | 3.6  | 2.7  |
| ADF                        | %       | 41.5  | 15.7 | 7.3  | 39.7 |
| NDF                        | %       | 59.0  | 24.8 | 14.1 | 55.5 |
| Hemicellulose <sup>1</sup> | %       | 17.5  | 9.1  | 6.8  | 15.8 |
| NFC                        | %       | 14.7  | 53.9 | 69.6 | 26.2 |
| Starch                     | %       | 6.4   | 39.1 | 56.9 | 0.7  |
| Sugars                     | %       | 5.9   | 7.4  | 8.3  | 11.3 |
| NSC <sup>2</sup>           | %       | 12.3  | 46.5 | 65.2 | 12.0 |
| Crude Fat                  | %       | 14.3  | 7.8  | 4.8  | 3.0  |
| Ash                        | %       | 5.9   | 4.1  | 3.5  | 7.5  |

<sup>1</sup>Hemicellulose: calculated as NDF-ADF; <sup>2</sup>NSC: calculated as Starch+Sugars.

ADF=Acid Detergent Fiber; NDF=Neutral Detergent Fiber; NFC=Non-fibrous Carbohydrates; NSC=Non-structural carbohydrates.

**Table S3.** The number of differentially expressed (DE) genes in the total dataset for 3 time points as well as the number that were upregulated or down-regulated relative to pre-exercise gene expression for horses on the high starch (HS) and the low starch, high fat (LS-HF) diets.

| HS compared to pre-exercise    |          |              |                |
|--------------------------------|----------|--------------|----------------|
| Time point                     | DE Genes | Up-regulated | Down-regulated |
| Depletion                      | 240      | 146          | 94             |
| Repletion 24h                  | 439      | 295          | 144            |
| Repletion 72h                  | 1820     | 1027         | 793            |
| LS-HF compared to pre-exercise |          |              |                |
| Time point                     | DE Genes | Upregulated  | Down-regulated |
| Depletion                      | 342      | 209          | 133            |
| Repletion 24h                  | 0        | 0            | 0              |
| Repletion 72h                  | 4010     | 2458         | 1552           |

**Table S4:** Gluteal muscle differential expression relative to pre-exercise for genes encoding activators or suppressors of GLUT4 translocation and *GLUT4* expression in horses on a high starch (HS) and low starch high fat (LS-HF) diets . Data is presented for time points glycogen depletion post-exercise, 24 h and 72 of repletion. Expression is presented as log<sub>2</sub> fold change (FC). Adjusted *P* values represent an FDR of *P*<0.05 and bolded asterisks indicates statistical significance.

| HS                                 |                |          |                |          |                |          |
|------------------------------------|----------------|----------|----------------|----------|----------------|----------|
| Gene                               | Post Depletion |          | 24 h Repletion |          | 72 h Repletion |          |
|                                    | Log2 FC        | Adj P    | Log2 FC        | Adj P    | Log2 FC        | Adj P    |
| Activators of GLUT4 translocation  |                |          |                |          |                |          |
| <i>PRKAA1</i>                      | 0.18           | 8.42E-01 | 0.12           | 8.18E-01 | 0.11           | 8.11E-01 |
| <i>PRKAA2</i>                      | -0.17          | 9.17E-01 | -0.2           | 7.54E-01 | -0.41          | 2.95E-01 |
| <i>PRKAB1</i>                      | 0.40           | 7.58E-02 | 0.23           | 4.66E-01 | 0.34           | 1.06E-01 |
| <i>PRKAB2</i>                      | -0.27          | 6.40E-01 | -0.54          | 1.31E-01 | -0.66*         | 2.47E-02 |
| <i>PRKAG2</i>                      | 0.59           | 1.37E-01 | -0.28          | 5.59E-01 | -0.23          | 5.91E-01 |
| <i>PRKAG3</i>                      | -0.67          | 4.08E-01 | -0.51          | 5.18E-01 | -1.24*         | 3.33E-02 |
| <i>RABGAP1</i>                     | -0.11          | 9.83E-01 | -0.25          | 4.11E-01 | -0.28          | 2.19E-01 |
| <i>RAB13</i>                       | 0.27           | 3.92E-01 | -0.34          | 1.75E-01 | -0.41*         | 3.72E-02 |
| <i>CBLB</i>                        | 0.08           | 1.00E+00 | 0.34           | 5.12E-01 | 0.80*          | 3.38E-02 |
| Suppressors of GLUT4 translocation |                |          |                |          |                |          |
| <i>TBC1D4</i>                      | -0.1           | 9.92E-01 | -0.43          | 2.84E-01 | -0.39          | 2.52E-01 |
| LS-HF                              |                |          |                |          |                |          |
| Gene                               | Post Depletion |          | 24 h Repletion |          | 72 h Repletion |          |
|                                    | Log2 FC        | Adj P    | Log2 FC        | Adj P    | Log2 FC        | Adj P    |
| Activators of GLUT4 translocation  |                |          |                |          |                |          |
| <i>PRKAA1</i>                      | 0.07           | 9.72E-01 | -0.13          | 1.00E+00 | 0.27           |          |
| <i>PRKAA2</i>                      | -0.19          | 8.42E-01 | 0.2            | 1.00E+00 | <b>-0.87*</b>  | 9.79E-03 |
| <i>PRKAB1</i>                      | <b>0.55*</b>   | 7.74E-03 | 0.16           | 1.00E+00 | <b>0.45*</b>   | 1.28E-02 |
| <i>PRKAB2</i>                      | -0.09          | 9.46E-01 | 0.17           | 1.00E+00 | <b>-0.62*</b>  | 1.55E-02 |
| <i>PRKAG2</i>                      | <b>1.06*</b>   | 3.40E-03 | 0.04           | 1.00E+00 | -0.23          | 5.32E-01 |
| <i>PRKAG3</i>                      | -0.76          | 3.09E-01 | -0.19          | 1.00E+00 | <b>-1.30*</b>  | 1.26E-02 |
| <i>RABGAP1</i>                     | -0.21          | 6.20E-01 | -0.07          | 1.00E+00 | <b>-0.46*</b>  | 8.98E-03 |
| <i>RAB13</i>                       | -0.19          | 6.85E-01 | 0.11           | 1.00E+00 | -0.35          | 5.35E-02 |
| <i>CBLB</i>                        | 0.19           | 8.52E-01 | -0.1           | 1.00E+00 | <b>0.85*</b>   | 1.10E-02 |
| Suppressors of GLUT4 translocation |                |          |                |          |                |          |
| <i>TBC1D4</i>                      | -0.27          | 6.54E-01 | -0.18          | 1.00E+00 | -0.59          | 3.99E-02 |

**Table S5:** Gluteal muscle differential expression relative to pre-exercise for genes encoding *GLUT4* expression in horses on a high starch (HS) and LS-HF diet. Data is presented for time points glycogen depletion post-exercise, 24 h and 72 of repletion. Expression is presented as log<sub>2</sub> fold change (FC). Adjusted *P* values represent an FDR of *P*<0.05 and bolded asterisks indicates statistical significance.

| HS                                |                     |          |                     |          |                     |          |
|-----------------------------------|---------------------|----------|---------------------|----------|---------------------|----------|
| GLUT4 transcriptional activators  |                     |          |                     |          |                     |          |
| Gene                              | Post depletion      |          | 24 h Repletion      |          | 72 h Repletion      |          |
|                                   | Log <sub>2</sub> FC | Adj P    | Log <sub>2</sub> FC | Adj P    | Log <sub>2</sub> FC | Adj P    |
| THRA                              | -0.35               | 4.94E-01 | -0.54               | 1.56E-01 | -0.43               | 1.78E-01 |
| THRB                              | -0.29               | 8.21E-01 | -1.01               | 1.08E-01 | <b>-1.06*</b>       | 3.80E-02 |
| PPARGC1A (PGC1)                   | 1.78                | 1.84E-02 | -1.10               | 1.95E-01 | -0.78               | 2.58E-01 |
| CEBPA                             | -0.06               | 1.00E+00 | 0.92                | 1.42E-01 | 0.85                | 9.93E-02 |
| MEF2A                             | -0.07               | 1.00E+00 | 0.02                | 9.80E-01 | -0.01               | 9.91E-01 |
| SLC2A4RG (GEF)                    | -0.57               | 7.80E-02 | -0.61               | 9.24E-02 | -0.48               | 1.03E-01 |
| SREBPF1                           | 0.58                | 2.67E-01 | 0.06                | 9.47E-01 | -0.16               | 7.86E-01 |
| MYOD1                             | -0.65               | 6.92E-01 | 0.03                | 9.89E-01 | -0.21               | 8.86E-01 |
| KLF15                             | -0.28               | 8.93E-01 | -0.50               | 5.65E-01 | -0.46               | 5.05E-01 |
| NRF-1                             | -0.21               | 7.08E-01 | 0.00                | 9.95E-01 | -0.14               | 7.23E-01 |
| GLUT4 transcriptional suppressors |                     |          |                     |          |                     |          |
| PPARG                             | 0.34                | 6.86E-01 | 0.29                | 6.49E-01 | 0.39                | 4.01E-01 |
| PPARA                             | -0.15               | 9.55E-01 | -0.65               | 1.60E-01 | <b>-0.76*</b>       | 4.80E-02 |
| NF1                               | 0.01                | 1.00E+00 | 0.28                | 3.70E-01 | 0.18                | 5.82E-01 |
| LS-HF                             |                     |          |                     |          |                     |          |
| Gene                              | Post Depletion      |          | 24 h Repletion      |          | 72 h Repletion      |          |
|                                   | Log <sub>2</sub> FC | Adj P    | Log <sub>2</sub> FC | Adj P    | Log <sub>2</sub> FC | Adj P    |
| GLUT4 transcriptional activators  |                     |          |                     |          |                     |          |
| THRA                              | -0.53               | 1.70E-01 | -0.22               | 1.00E+00 | <b>-0.63*</b>       | 2.64E-02 |
| THRB                              | -0.35               | 7.03E-01 | -0.25               | 1.00E+00 | <b>-0.94*</b>       | 3.78E-02 |
| PPARGC1A (PGC1)                   | <b>2.29*</b>        | 4.11E-03 | 0.45                | 1.00E+00 | -0.93               | 1.31E-01 |
| CEBPA                             | 0.28                | 8.10E-01 | 0.30                | 1.00E+00 | <b>1.56*</b>        | 1.37E-03 |
| MEF2A                             | -0.04               | 9.93E-01 | -0.09               | 1.00E+00 | -0.35               | 1.26E-01 |
| SLC2A4RG (GEF)                    | -0.58               | 7.18E-02 | -0.69               | 1.15E-01 | -0.28               | 3.20E-01 |
| SREBPF1                           | 1.21                | 5.18E-03 | 0.19                | 1.00E+00 | -0.18               | 6.88E-01 |
| MYOD1                             | -0.99               | 3.72E-01 | -0.91               | 9.30E-01 | 0.19                | 8.36E-01 |
| KLF15                             | -0.87               | 2.71E-01 | 0.06                | 1.00E+00 | -0.71               | 1.80E-01 |
| NRF-1                             | 0.02                | 9.99E-01 | -0.06               | 1.00E+00 | 0.19                | 4.98E-01 |
| GLUT4 transcriptional suppressors |                     |          |                     |          |                     |          |

|                     |       |          |       |          |               |          |
|---------------------|-------|----------|-------|----------|---------------|----------|
| <i><b>PPARG</b></i> | 0.22  | 8.18E-01 | -0.02 | 1.00E+00 | <b>1.03*</b>  | 3.93E-03 |
| <i><b>PPARA</b></i> | -0.45 | 4.19E-01 | -0.16 | 1.00E+00 | <b>-0.89*</b> | 1.18E-02 |
| <i><b>NF1</b></i>   | 0.27  | 4.57E-01 | 0.17  | 1.00E+00 | 0.16          | 5.88E-01 |

**Table S6.** Differential expression of glucose transporters immediately after the third exercise session (depletion) and after 24h and 72 h of glycogen repletion in comparison to pre-exercise. Data are expressed as log<sub>2</sub> fold change (FC) and with the adjusted (Adj) P values for an FDR of  $P < 0.05$ .

| Gene          | HS                  |              |                     |              |                     |              | LS-HF               |              |                     |              |                     |              |
|---------------|---------------------|--------------|---------------------|--------------|---------------------|--------------|---------------------|--------------|---------------------|--------------|---------------------|--------------|
|               | Depletion           |              | 24h Repletion       |              | 72h Depletion       |              | Depletion           |              | 24h Repletion       |              | 72h Depletion       |              |
|               | Log <sub>2</sub> FC | Adj <i>P</i> |
| <i>GLUT1</i>  | 0.25                | 8.61 E-01    | 0.72                | 1.97E-01     | 0.67                | 1.37E-01     | -0.10               | 9.65E-01     | -0.06               | 1.00E+0      | 1.23                | 2.50E-03*    |
| <i>GLUT3</i>  | 0.24                | 9.57 E-01    | 1.28                | 1.05E-01     | 1.38                | 3.60E-02     | 0.72                | 4.66E-01     | -0.12               | 1.00E+0      | 2.01                | 1.88E-03*    |
| <i>GLUT4</i>  | 0.37                | 7.11 E-01    | -0.59               | 3.49E-01     | -0.76               | 1.13E-01     | 0.38                | 6.68E-01     | 0.05                | 1.00E+0      | -0.97               | 2.64E-02*    |
| <i>GLUT5</i>  | 0.05                | 1.00 E+00    | -0.77               | 2.08E-01     | -1.12               | 2.97E-02*    | 0.19                | 8.81E-01     | -0.27               | 1.00E+0      | -0.38               | 4.18E-01     |
| <i>GLUT6</i>  | -0.01               | 1.00 E+00    | 1.74                | 6.68E-02     | 2.14                | 1.23E-02*    | 0.16                | 9.69E-01     | -0.54               | 1.00E+0      | 2.05                | 3.25E-03*    |
| <i>GLUT8</i>  | -0.23               | 6.62 E-01    | -0.38               | 2.06E-01     | -0.37               | 1.31E-01     | -0.17               | 7.96E-01     | 0.12                | 1.00E+0      | -0.53               | 1.39E-02*    |
| <i>GLUT9</i>  | 0.33                | 6.29 E-01    | 0.25                | 6.72E-01     | 0.35                | 3.81E-01     | 0.11                | 9.35E-01     | -0.21               | 1.00E+0      | 0.91                | 4.07E-03*    |
| <i>GLUT10</i> | 1.15                | 2.41 E-01    | 2.26                | 2.82E-02*    | 1.82                | 2.02E-02*    | 0.26                | 8.93E-01     | -0.40               | 1.00E+0      | 1.30                | 2.29E-02*    |
| <i>GLUT11</i> | -0.19               | 8.44 E-01    | -0.25               | 5.97E-01     | -0.10               | 8.51E-01     | -0.58               | 1.07E-01     | -0.15               | 1.00E+0      | -0.20               | 5.41E-01     |
| <i>GLUT12</i> | -0.08               | 1.00 E+00    | -0.23               | 7.14E-01     | -0.42               | 2.94E-01     | -0.14               | 8.98E-01     | 0.15                | 1.00E+0      | -0.88               | 1.15E-02*    |

\* significantly differentially expressed (DE). No genes were DE at 24 h repletion on the LS-HF diet

**Table S7:** The gene expression of glucose transporters (counts per million reads CPM) in gluteal muscle samples obtained before exercise, after 3 days of glycogen depleting exercise and 24 and 72 h after a period of repletion on either isocaloric high starch or a low starch high fat diet. Asterisk indicates significant difference from the corresponding timepoint on the LS-HF diet.

| Gene          | Pre    | Depletion | 24 h Repletion | 72 h Repletion | Pooled SD | Pre   | Depletion | 24 h Repletion | 72 h Repletion | Pooled SD |
|---------------|--------|-----------|----------------|----------------|-----------|-------|-----------|----------------|----------------|-----------|
| HS            |        |           |                |                |           | LS-HF |           |                |                |           |
| <i>GLUT1</i>  | 1.88   | 2.13      | 2.60           | 2.55           | 0.32      | 2.13  | 2.03      | 2.07           | 3.36           | 0.21      |
| <i>GLUT3</i>  | 2.59   | 2.83      | 3.87*          | 3.97           | 0.29      | 2.58  | 3.30      | 2.46           | 4.59           | 0.31      |
| <i>GLUT4</i>  | 7.73   | 8.10      | 7.14           | 6.96           | 0.36      | 7.54  | 7.92      | 7.59           | 6.57           | 0.10      |
| <i>GLUT5</i>  | -0.50  | -0.45     | -1.27          | -1.62          | 0.33      | -0.63 | -0.44     | -0.90          | -1.01          | 0.43      |
| <i>GLUT6</i>  | -0.38  | -0.39*    | 1.37*          | 1.76           | 0.36      | -0.03 | 0.14      | -0.57          | 2.02           | 0.23      |
| <i>GLUT8</i>  | 5.03   | 4.80      | 4.65*          | 4.66*          | 0.12      | 4.87  | 4.70      | 4.98           | 4.34           | 0.11      |
| <i>GLUT9</i>  | 1.91   | 2.24      | 2.16           | 2.26*          | 0.16      | 2.13  | 2.25      | 1.93           | 3.04           | 0.19      |
| <i>GLUT10</i> | -1.13* | 0.02      | 1.13*          | 0.69           | 0.67      | 0.34  | 0.60      | -0.06          | 1.65           | 0.33      |
| <i>GLUT11</i> | 2.83*  | 2.64      | 2.58*          | 2.74           | 0.09      | 3.12  | 2.54      | 2.97           | 2.92           | 0.20      |
| <i>GLUT12</i> | 3.50   | 3.42      | 3.28           | 3.08           | 0.47      | 3.63  | 3.49      | 3.78           | 2.75           | 0.24      |
| <b>Total</b>  | 23.47  |           |                |                |           | 25.6  |           |                |                |           |
|               |        | 25.34     | 28.00          | 27.05          | 3.17      | 8     | 26.51     | 24.25          | 30.23          | 3.17      |

\* = significant differences between HS and LS-HF diets for that specific time point and transporter.

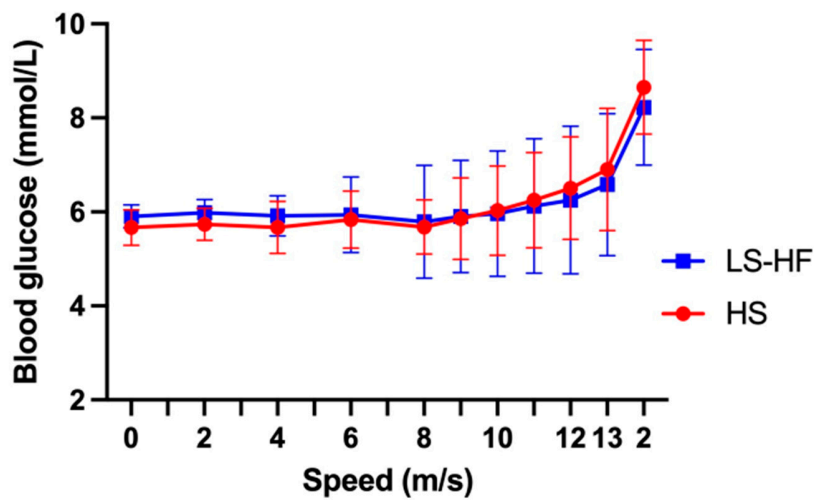

**Figure S1.** Blood glucose concentrations before and at each speed of the incremental exercise test. There was no significant difference in glucose concentrations between the HS and LS-HF diets.

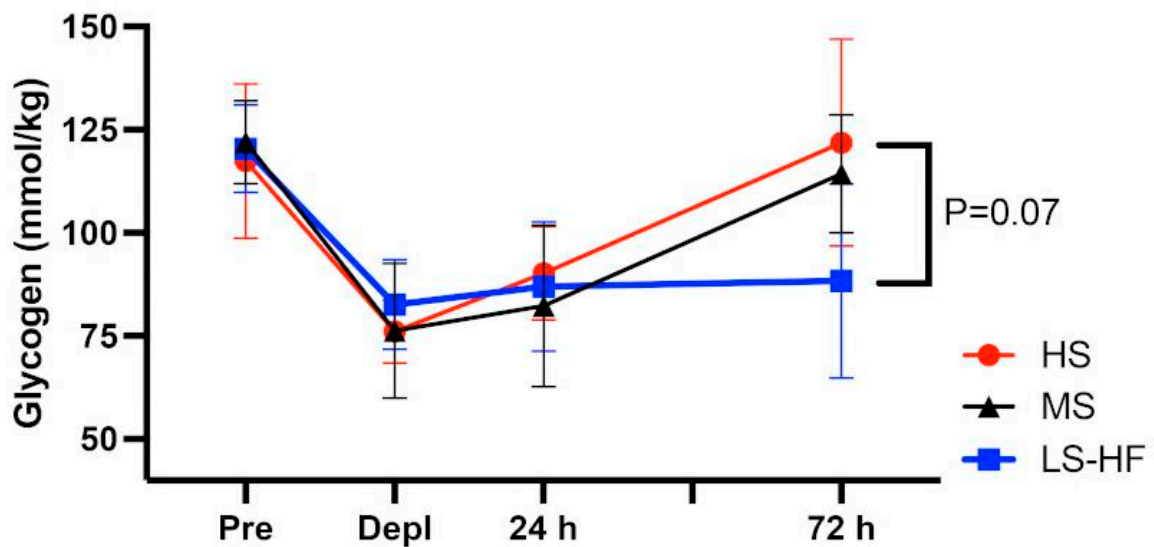

**Figure S2.** Muscle glycogen concentrations in 5 horses prior to exercise, after 3 days of intense exercise, and 24 and 72 h after being fed their respective diets and rested. There was a significant effect of horse, time, and a time by glycogen interaction. Overall, glycogen concentrations did not differ between diets, but there was a significant time x diet interaction and trend ( $p < 0.08$ ) for lower muscle glycogen concentrations on the low-starch, high-fat (LS-HF) compared to the medium-starch (MS) or high-starch (HS) diets.
